# Supplementary material for: Comparison of Deep-Water Viromes from the Atlantic Ocean and the Mediterranean Sea
Source: PLOS journal article supplement (doi:10.1371/journal.pone.0100600), 2014-06-24

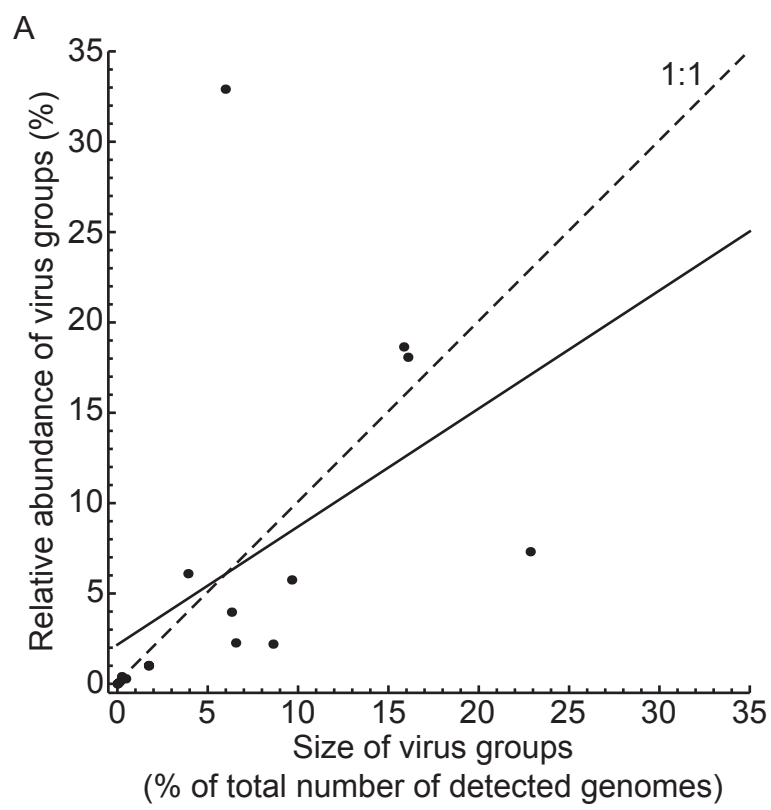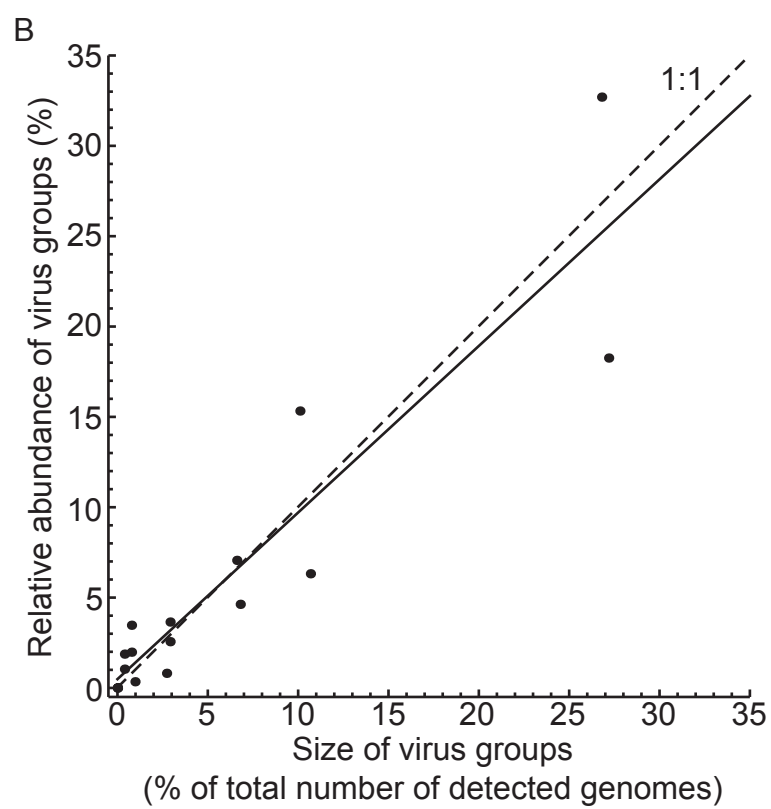

Supplement: S2 (10.1371/journal.pone.0100600.s002) [file journal.pone.0100600.s002]
